# Supplementary material
Source: MDPI journal article supplement (https://www.mdpi.com/2073-4441/10/2/154)
Supplement: s1 [file s1]

The Effects of Antibiotics on Microbial Community Composition in an Estuary Reservoir during Spring and Summer Seasons

**Supplementary Methods**

*Chemicals and standards for antibiotics detection*

Each compound was prepared by diluting the stock solution (1000 mg/L) with methanol to obtain mixture of working standards at concentration of 10 mg/L. Methanol and acetonitrile were of HPLC grade and purchased from Sinopharm Chemical Reagent Co., Ltd. (Ourchem, China). Ultra-pure water was obtained from a Milli-Q water purification system (Millipore, Billerica, MA, USA). All standard solutions were stored in the refrigerator at −20 ℃. Formic acid, hydrochloric acid, and disodium ethylenediamine tetracetate (Na2EDTA) were of analytical grade and purchased from Sinopharm Chemical Reagent Co., Ltd. (Tianjin, China).

*Sample preparation and extraction*

The filtered water samples (1 L) were extracted using Poly-Sery HLB SPE cartridges (200mg, 6mL, ANPEL). All cartridges were preconditioned with 10ml methanol and 10ml Milli-Q water at a flow rate of 1ml/min. Before extraction, the samples were acidified to pH = 3 with hydrochloric acid, followed by the addition of 0.5g Na2EDTA as the chelating agent, then spiked with 50 ng labeled compound (1 mg/L). The extraction rate by SPE was 3-5ml/min. After extracted, antibiotics were eluted from SPE cartridges with 10ml methanol, and the eluent was condensed to dryness under a gentle stream of N2. Finally, 0.5ml of internal standard (NFX-D5, 80μg/L) was added.

The target antibiotics were performed by TSQ Quantum Access Max ultra-performance liquid chromatograph-tandem mass spectrometry system (Thermo Fisher Scientific, USA). The separation was performed with Agilent C18 column (50 mm × 2.1 mm, 1.8 μm). The temperature of the column was maintained at 30 °C, the flow rate was 0.3 mL/min, and the injection volume was 10 μL. Mobile phase: eluent A is ultrapure water containing 0.1% formic acid (V/V) and eluent B is acetonitrile. The gradient program was as follows: 95% A (0-1.3min), 95%-60% A (1.3-8min), 60% A (8-10min), 95% A (10-12min). Mass spectrometric analysis was operated with positive electrospray ionization (ESI+) source in multiple reaction monitoring (MRM) mode.

*Quality assurance/quality control*

Standard solutions (from 5 to 400 μg/L in seven points) spiking with the same internal standards performed strong linearity which correlation coefficients (r2) of the standard curves were higher than 0.99. The limits of detection (LOD) for antibiotics were defined as the concentrations corresponding to the signal-to-noise (S/N) of 3 and ranged from 0.21-2.41 ng/L. The limits of quantification (LOQ) for antibiotics were defined as the concentrations corresponding to the signal-to-noise (S/N) of 10 and ranged from 0.46-8.32 ng/L. The mean recoveries of 16 antibiotics spiked to the filtered surface water (n = 3) were between 69%-125%. Moreover, triplicate Milli-Q water samples, used as field blank samples, were all detected below the LOD.

*The PCR amplification of genomic DNA*

The PCR amplifications were performed in 25 μL reaction mixtures containing 5.0μL 5* Q5 Reaction Buffer, 5.0μL 5*Q5 GC high Enhancer, 2.5 mM of dNTPs 2.0μL, 1.0μL of forward and reverse primers, respectively (10μM each), 0.25μL of Q5 DNA Polymerase (5U/μL), 1μL DNA template (20ng/μL each). The following PCR cycling parameters were included: an initial denaturation at 98 °C for 5 min, followed by 27 cycles of denaturation at 98 °C for 30 s, annealing at 50 °C C for 30 s, extension at 72 °C for 30 s, and a final elongation at 72 °C for 5 min. The 16S rRNA PCR products were then further purified using MinElute PCR Purification Kit (Qiagen, Gmbh, Germany).

*Quality control progress of sequencing data*

Raw data were processed using the Quantitative Insights into Microbial Ecology (QIIME) pipeline (version 1.7.0, http://qiime.org/) for quality control. Uchime was implemented in Mothur (version 1.31.2, http://www.mothur.org/) to identify and remove chimeric sequences (Schloss et al., 2009; Edgar et al., 2011). At this stage, sequences less than 150 bp in length, mean quality less than 20, sequences, containing Ns and any ambiguous bases pairs were eliminated from pair-end sequence reads. Sequences were subsampled at a level of 21869 reads for each sample before performing the further analysis. Purified sequences were binned into operational taxonomic units (OTUs) based on 97% identity threshold, the longest sequence of each OTU was selected as the representative sequence for that OTU based on UCLUST algorithm by using QIIME (Edgar, 2010). The taxonomic identity of OTUs were aligned and compared with Ribosomal Database Project classifier (Release 11.1 http://rdp.cme.msu.edu/), SILVA database (Release119 http://www.arb-silva.de) against the Greengenes database (97% taxonomy) (Release 13.8 http://greengenes.secondgenome.com/), which were used for taxonomy assignment of bacteria and archaea (DeSantis et al., 2006; Cole et al., 2009; Quast et al., 2013).

**References**

1. Assenov, Y., Ramírez, F., Schelhorn, S.E., Lengauer, T., Albrecht, M., 2008. Computing topological parameters of biological networks. Bioinformatics 24, 282.
2. Benjamini, Y., Hochberg, Y., 1995. Controlling the False Discovery Rate: A Practical and Powerful Approach to Multiple Testing. J. Roy. Stat. Soc.B 57, 289-300.
3. Cole, J.R., Wang, Q., Cardenas, E., Fish, J., Chai, B., Farris, R.J., Kulam-Syed-Mohideen, A.S., McGarrell, D.M., Marsh, T., Garrity, G.M., Tiedje, J.M., 2009. The Ribosomal Database Project: improved alignments and new tools for rRNA analysis. Nucleic acids research 37, D141-145.
4. DeSantis, T.Z., Hugenholtz, P., Larsen, N., Rojas, M., Brodie, E.L., Keller, K., Huber, T., Dalevi, D., Hu, P., Andersen, G.L., 2006. Greengenes, a Chimera-Checked 16S rRNA Gene Database and Workbench Compatible with ARB. Appl. Environ. Microbiol. 72, 5069-5072.
5. Edgar, R.C., 2010. Search and clustering orders of magnitude faster than BLAST. Bioinformatics 26, 2460.
6. Edgar, R.C., Haas, B.J., Clemente, J.C., Quince, C., Knight, R., 2011. UCHIME improves sensitivity and speed of chimera detection. Bioinformatics 27, 2194-2200.
7. Quast, C., Pruesse, E., Yilmaz, P., Gerken, J., Schweer, T., Yarza, P., Peplies, J., Glöckner, F.O., 2013. The SILVA ribosomal RNA gene database project: improved data processing and web-based tools. Nucleic acids research 41, D590.
8. Schloss, P.D., Westcott, S.L., Ryabin, T., Hall, J.R., Hartmann, M., Hollister, E.B., Lesniewski, R.A., Oakley, B.B., Parks, D.H., Robinson, C.J., 2009. Introducing mothur: open-source, platform-independent, community-supported software for describing and comparing microbial communities. Appl. Environ. Microb. 75, 7537.


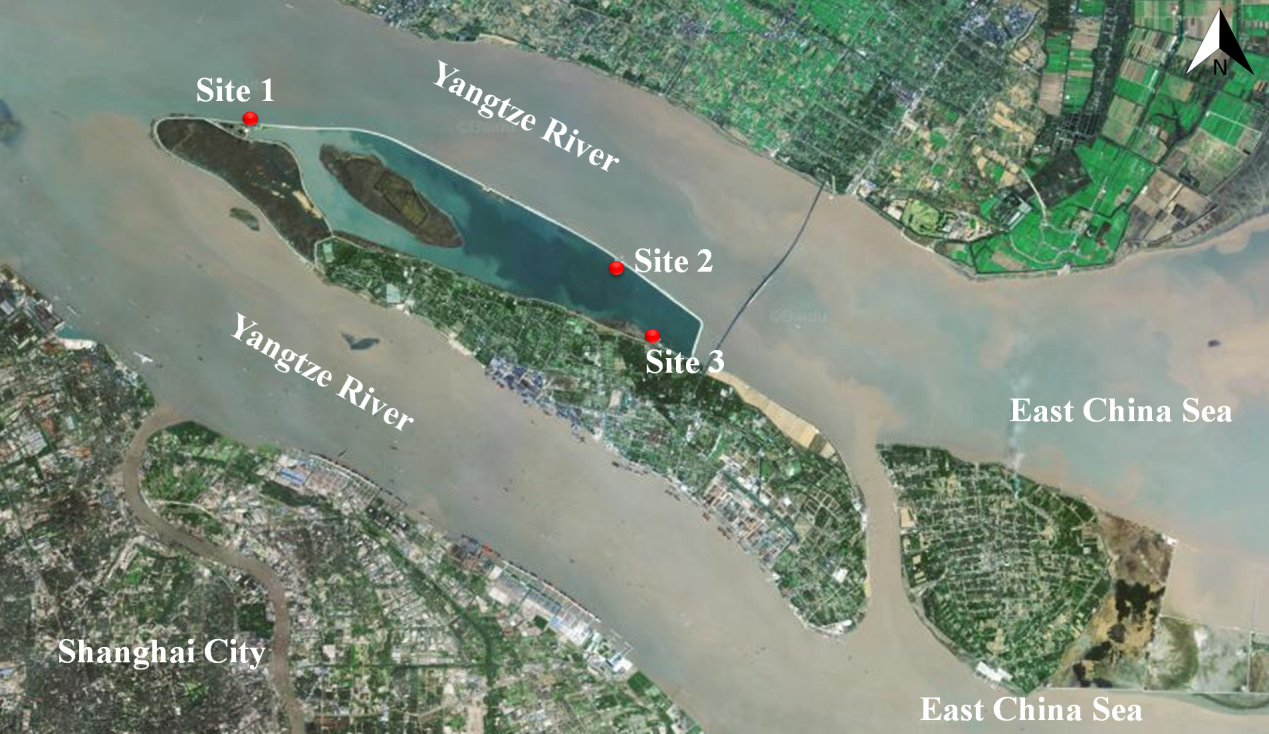


**Figure S1.** Aerial schematic of Qingcaosha (QCS) Reservoir and annotated sampling locations (Site 1 (Inlet), Site 2 (Internal), Site 3 (Exit)).


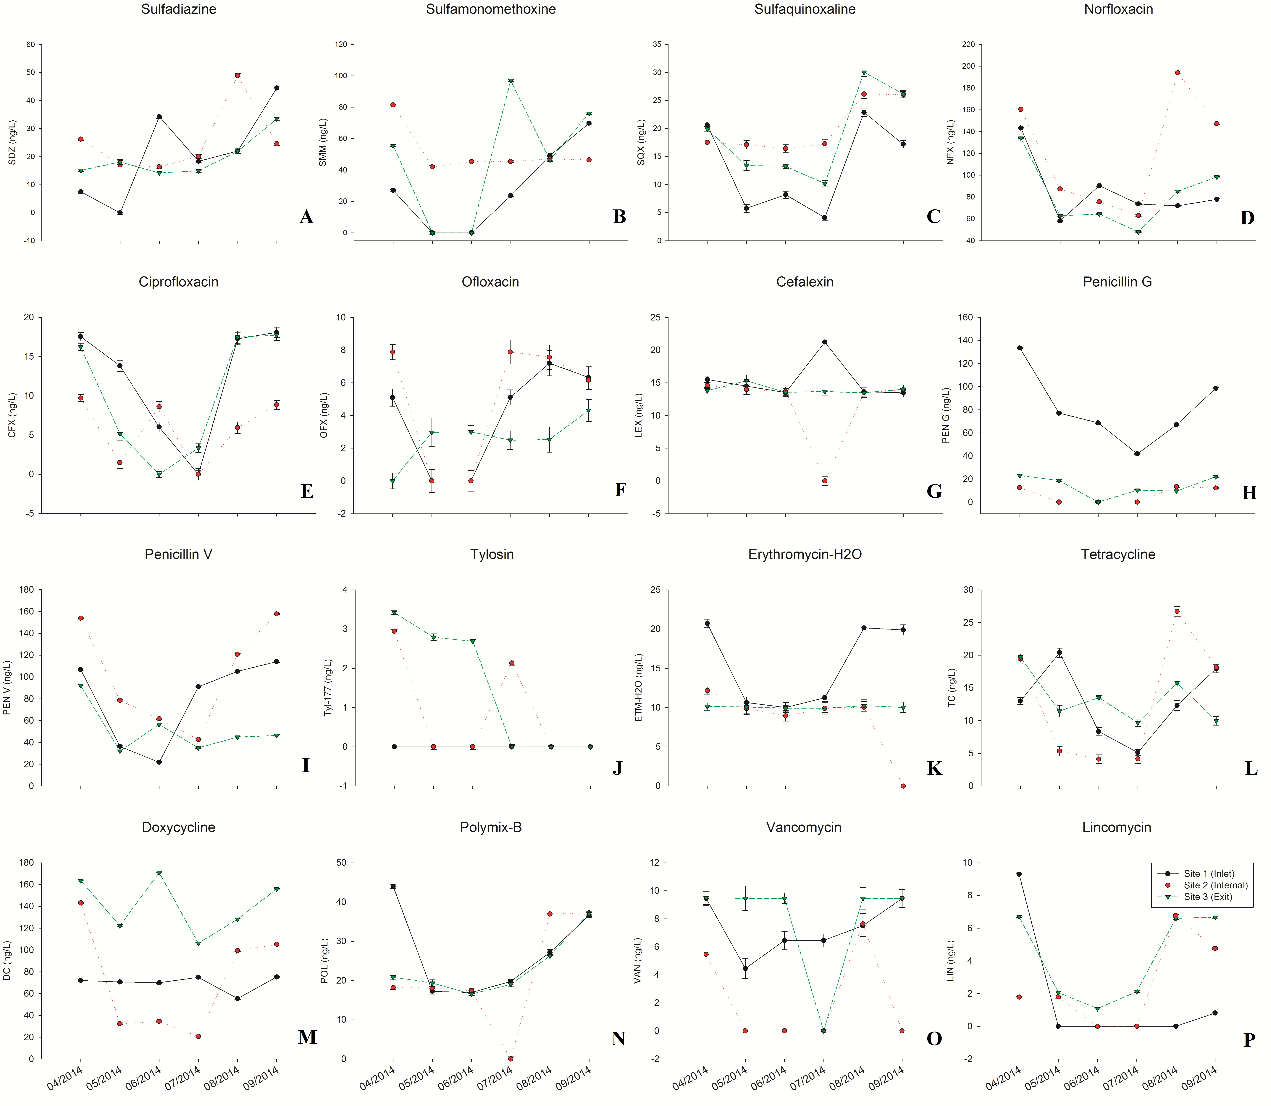


**Figure S2.** Concentrations of antibiotics at the three sites. (**A**) SDZ, (**B**) SMM, (**C**) SQX, (**D**) NFX, (**E**) CFX, (**F**) OFX, (**G**) LEX, (**H**) PEN G, (**I**) PEN V, (**J**) TYL, (**K**) ETM, (**L**) TC, (**M**) DC, (**N**) POL, (**O**) VAN, (**P**) LIN.


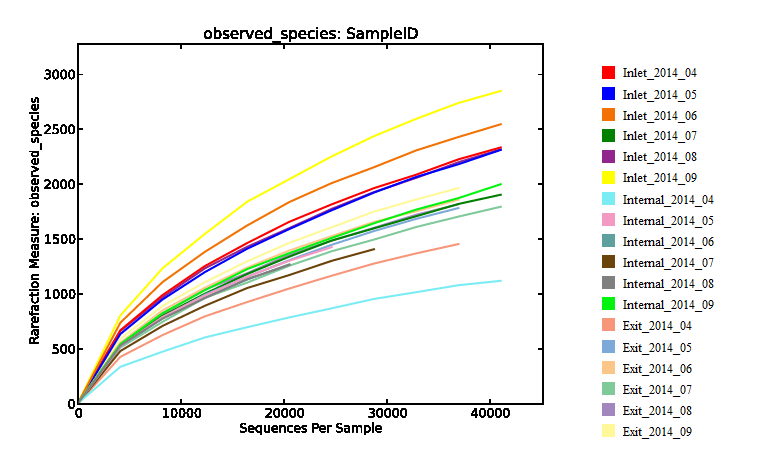


**Figure S3.** Rarefaction curves of sequences in each sample.

**Table S1.** Supplemental water chemistry and environmental parameters.

| **Group** | **TC** | | | **TOC** | | | **IC** | | | **TN** | | | **TP** | | | **Ammonia** | | |
| --- | --- | --- | --- | --- | --- | --- | --- | --- | --- | --- | --- | --- | --- | --- | --- | --- | --- | --- |
| Inlet_2014_04 | 22.64 | | | 3.22 | | | 19.42 | | | 2.64 | | | 0.121 | | | 0.435 | | |
| Inlet_2014_05 | 24.49 | | | 4.68 | | | 19.81 | | | 2.27 | | | 0.0704 | | | 0.248 | | |
| Inlet_2014_06 | 22.75 | | | 5.79 | | | 16.96 | | | 2.16 | | | 0.0744 | | | 0.268 | | |
| Inlet_2014_07 | 22.98 | | | 3.38 | | | 19.6 | | | 2.12 | | | 0.0665 | | | 0.1955 | | |
| Inlet_2014_08 | 23.98 | | | 15.45 | | | 8.53 | | | 1.6 | | | 0.0677 | | | 0.0555 | | |
| Inlet_2014_09 | 23.52 | | | 2.93 | | | 20.59 | | | 1.33 | | | 0.0504 | | | 0.1045 | | |
| Internal_2014_04 | 23.55 | | | 3.25 | | | 20.3 | | | 2.03 | | | 0.0344 | | | 0.95 | | |
| Internal_2014_05 | 25.45 | | | 4.4 | | | 21.05 | | | 1.83 | | | 0.0264 | | | 0.263 | | |
| Internal_2014_06 | 24.73 | | | 5.17 | | | 19.56 | | | 1.45 | | | 0.0304 | | | 0.2185 | | |
| Internal_2014_07 | 22.39 | | | 3.42 | | | 18.97 | | | 1.46 | | | 0.0837 | | | 0.334 | | |
| Internal_2014_08 | 23.72 | | | 15.51 | | | 8.22 | | | 1.04 | | | 0.0677 | | | 0.1045 | | |
| Internal_2014_09 | 24.31 | | | 2.97 | | | 21.33 | | | 1.61 | | | 0.0204 | | | 0.1 | | |
| Exit_2014_04 | 25.32 | | | 4.47 | | | 20.86 | | | 2.14 | | | 0.0418 | | | 0.64 | | |
| Exit_2014_05 | 25.6 | | | 4.38 | | | 21.21 | | | 1.91 | | | 0.0384 | | | 0.322 | | |
| Exit_2014_06 | 28.73 | | | 8.03 | | | 20.71 | | | 1.79 | | | 0.0104 | | | 0.3815 | | |
| Exit_2014_07 | 22.26 | | | 3.54 | | | 18.72 | | | 1.49 | | | 0.0236 | | | 0.3785 | | |
| Exit_2014_08 | 23.45 | | | 15.36 | | | 8.09 | | | 1.08 | | | 0.0196 | | | 0.0555 | | |
| Exit_2014_09 | 24.26 | | | 3.29 | | | 20.96 | | | 1.18 | | | 0.0192 | | | 0.095 | | |
| **Group** | | **pH** | | | **DO** | | | **NTU** | | | **Temperature/**°C | | | | **Cl** | | | **Sulfate** | | |
| Inlet_2014_04 | | 7.92 | | | 10.17 | | | 54.3 | | | 17.2 | | | | 18.39 | | | 28.22 | | |
| Inlet_2014_05 | | 7.94 | | | 8.23 | | | 69.9 | | | 22.7 | | | | 14.549 | | | 38.149 | | |
| Inlet_2014_06 | | 8.25 | | | 7.87 | | | 39.6 | | | 25.6 | | | | 10.606 | | | 33.13 | | |
| Inlet_2014_07 | | 7.8 | | | 6.66 | | | 34.9 | | | 29.1 | | | | 10.477 | | | 32.347 | | |
| Inlet_2014_08 | | 7.82 | | | 6.93 | | | 34.9 | | | 28.1 | | | | 13.614 | | | 34.624 | | |
| Inlet_2014_09 | | 8.08 | | | 7.83 | | | 125 | | | 24.7 | | | | 13.708 | | | 32.469 | | |
| Internal_2014_04 | | 9.17 | | | 11.44 | | | 6.83 | | | 16.4 | | | | 76.61 | | | 37.05 | | |
| Internal_2014_05 | | 8.71 | | | 10.95 | | | 8.91 | | | 23.4 | | | | 35.322 | | | 45.001 | | |
| Internal_2014_06 | | 9.3 | | | 10.37 | | | 9.93 | | | 25.2 | | | | 17.724 | | | 34.974 | | |
| Internal_2014_07 | | 8.69 | | | 8.6 | | | 13.7 | | | 28.8 | | | | 13.472 | | | 32.412 | | |
| Internal_2014_08 | | 8.53 | | | 8.91 | | | 11.9 | | | 28.4 | | | | 12.361 | | | 31.151 | | |
| Internal_2014_09 | | 8.21 | | | 7.91 | | | 11.4 | | | 24 | | | | 14.464 | | | 32.559 | | |
| Exit_2014_04 | | 9.24 | | | 10.75 | | | 8.22 | | | 15.3 | | | | 79.79 | | | 36.67 | | |
| Exit_2014_05 | | 8.37 | | | 8.98 | | | 9.61 | | | 24.1 | | | | 35.795 | | | 44.695 | | |
| Exit_2014_06 | | 8.77 | | | 8.56 | | | 9.37 | | | 23.9 | | | | 19.637 | | | 36.146 | | |
| Exit_2014_07 | | 8.34 | | | 7.2 | | | 12.2 | | | 28.6 | | | | 13.621 | | | 32.499 | | |
| Exit_2014_08 | | 8.79 | | | 9.4 | | | 13.3 | | | 28.2 | | | | 12.662 | | | 31.346 | | |
| Exit_2014_09 | | 8.16 | | | 8.19 | | | 12.1 | | | 23.9 | | | | 14.208 | | | 32.402 | | |
| **Group** | | | **Ca** | | | **Mg** | | | **Na** | | | **Al** | | **K** | | | **Chl-α** | | |
| Inlet_2014_04 | | | 33.29 | | | 7.539 | | | 15.12 | | | 0.0252 | | 2.344 | | | 0 | | |
| Inlet_2014_05 | | | 36.26 | | | 7.417 | | | 11.65 | | | 0.0124 | | 2.691 | | | 0 | | |
| Inlet_2014_06 | | | 33.33 | | | 6.458 | | | 8.573 | | | 0.0089 | | 2.186 | | | 0 | | |
| Inlet_2014_07 | | | 33.68 | | | 6.526 | | | 8.608 | | | 0.007 | | 2.232 | | | 3.5366667 | | |
| Inlet_2014_08 | | | 33.3 | | | 7.066 | | | 10.53 | | | 0.0086 | | 2.328 | | | 0 | | |
| Inlet_2014_09 | | | 33.9 | | | 7.536 | | | 10.61 | | | 0.166 | | 2.173 | | | 0 | | |
| Internal_2014_04 | | | 37.09 | | | 11 | | | 42.73 | | | 0.0049 | | 3.526 | | | 0 | | |
| Internal_2014_05 | | | 38.5 | | | 8.843 | | | 21.37 | | | 0.0078 | | 3.098 | | | 0 | | |
| Internal_2014_06 | | | 33.75 | | | 7.047 | | | 12.54 | | | 0.0026 | | 2.642 | | | 3.43 | | |
| Internal_2014_07 | | | 31.72 | | | 6.494 | | | 10.13 | | | 0.0052 | | 2.526 | | | 8.8533333 | | |
| Internal_2014_08 | | | 30.81 | | | 6.387 | | | 9.276 | | | 0.0078 | | 2.393 | | | 9.37 | | |
| Internal_2014_09 | | | 32.15 | | | 7.074 | | | 10.89 | | | 0.0076 | | 2.282 | | | 1.6366667 | | |
| Exit_2014_04 | | | 38.45 | | | 11.47 | | | 44.67 | | | 0.0195 | | 3.856 | | | 0 | | |
| Exit_2014_05 | | | 38.43 | | | 8.869 | | | 21.58 | | | 0.0075 | | 3.173 | | | 0 | | |
| Exit_2014_06 | | | 34.69 | | | 7.326 | | | 13.45 | | | 0.0007 | | 2.677 | | | 2.4 | | |
| Exit_2014_07 | | | 29.95 | | | 6.091 | | | 9.825 | | | 0.0021 | | 2.39 | | | 5.1166667 | | |
| Exit_2014_08 | | | 31.17 | | | 6.34 | | | 9.515 | | | 0.005 | | 2.376 | | | 10.783333 | | |
| Exit_2014_09 | | | 31.43 | | | 6.878 | | | 10.59 | | | 0.0016 | | 2.245 | | | 1.1966667 | | |

**Table S2.** DistLM results of abundant bacterial community data against environmental variables (999 permutations).

| **MARGINAL TESTS** | | | | |
| --- | --- | --- | --- | --- |
| **Variable** | **SS(trace)** | **Pseudo-F** | **P** | **Prop.** |
| TC | 1620.4 | 1.3429 | 0.132 | 7.743E-02 |
| TOC | 1082.9 | 0.87317 | 0.57 | 5.1749E-02 |
| IC | 1355.6 | 1.1083 | 0.276 | 6.478E-02 |
| TN | 2763.8 | 2.4348 | **0.003** | 0.13207 |
| TP | 1708.9 | 1.4227 | 0.078 | 8.166E-02 |
| NH4+-N | 3592.7 | 3.3163 | **0.001** | 0.17168 |
| pH | 2710.5 | 2.3807 | **0.005** | 0.12952 |
| DO | 2973.1 | 2.6497 | **0.001** | 0.14208 |
| EC | 3732.3 | 3.4731 | **0.001** | 0.17835 |
| Turbidity | 2595.1 | 2.2651 | **0.012** | 0.12401 |
| Temperature | 3597.4 | 3.3214 | **0.001** | 0.1719 |
| Cl | 3711.7 | 3.4497 | **0.001** | 0.17737 |
| SO42- | 1809.4 | 1.5144 | 0.072 | 8.6464E-02 |
| F | 3006.6 | 2.6845 | **0.002** | 0.14367 |
| Ca | 3027.5 | 2.7063 | **0.002** | 0.14467 |
| Mg | 3647 | 3.3769 | **0.001** | 0.17428 |
| Na | 3763.5 | 3.5085 | **0.001** | 0.17984 |
| Al | 1555.7 | 1.285 | 0.08 | 7.4341E-02 |
| K | 3473.6 | 3.1844 | **0.001** | 0.16599 |
| Si | 1704.7 | 1.419 | 0.107 | 8.1461E-02 |
| Chl-a | 2903.3 | 2.5774 | **0.004** | 0.13874 |

**Bold** = significantly correlated with community structure at a = 0.05.

**Table S3.** DistLM results of abundant bacterial community data against antibiotics (999 permutations).

| **MARGINAL TESTS** | | | | |
| --- | --- | --- | --- | --- |
| **Variable** | **SS(trace)** | **Pseudo-F** | **P** | **Prop.** |
| SQX | 1402.1 | 1.149 | 0.2706 | 6.70E-02 |
| SDZ | 1371.5 | 1.1222 | 0.291 | 6.55E-02 |
| SMM | 1521.1 | 1.2541 | 0.1878 | 7.27E-02 |
| NFX | 1400.5 | 1.1476 | 0.252 | 6.69E-02 |
| CFX | 1366 | 1.1174 | 0.2896 | 6.53E-02 |
| OFX | 1203 | 0.97588 | 0.4497 | 5.75E-02 |
| LEX | 772.56 | 0.61333 | 0.9172 | 3.69E-02 |
| PEN G | 2935.2 | 2.6104 | **0.0013** | 0.14026 |
| PEN V | 1145.6 | 0.92662 | 0.5084 | 5.47E-02 |
| TYL | 2432.3 | 2.1043 | **0.0139** | 0.11623 |
| ETM | 2052.9 | 1.7403 | **0.0312** | 9.81E-02 |
| TC | 1017.2 | 0.81744 | 0.6825 | 4.86E-02 |
| DC | 1310 | 1.0685 | 0.3337 | 6.26E-02 |
| LIN | 1254.4 | 1.0203 | 0.3755 | 5.99E-02 |
| VAN | 1035.7 | 0.83313 | 0.6501 | 4.95E-02 |
| POL | 1165.3 | 0.94354 | 0.4794 | 5.57E-02 |

**Bold** = significantly correlated with community structure at a = 0.05.

**Table S4.** DistLM results of environmental variables against antibiotics (999 permutations).

| **MARGINAL TESTS** | | | | |
| --- | --- | --- | --- | --- |
| **Variable** | **SS(trace)** | **Pseudo-F** | **P** | **Prop.** |
| TC | 17.089 | 1.0726 | 0.352 | 6.28E-02 |
| TOC | 11.97 | 0.73654 | 0.675 | 4.40E-02 |
| IC | 14.385 | 0.89341 | 0.548 | 5.29E-02 |
| TN | 25.174 | 1.6318 | 0.11 | 9.26E-02 |
| TP | 23.675 | 1.5254 | 0.125 | 8.70E-02 |
| Ammonia | 17.947 | 1.1303 | 0.33 | 6.60E-02 |
| pH | 24.51 | 1.5846 | 0.106 | 9.01E-02 |
| DO | 13.608 | 0.8426 | 0.556 | 5.00E-02 |
| Turbidity | 31.097 | 2.0653 | **0.038** | 1.14E-01 |
| Temperature | 24.156 | 1.5594 | 0.128 | 8.88E-02 |
| Cl | 21.693 | 1.3867 | 0.217 | 7.98E-02 |
| Sulfate | 21.834 | 1.3965 | 0.161 | 8.03E-02 |
| Ca | 16.814 | 1.0542 | 0.368 | 6.18E-02 |
| Mg | 18.983 | 1.2004 | 0.282 | 6.98E-02 |
| Na | 21.54 | 1.376 | 0.177 | 7.92E-02 |
| Al | 21.595 | 1.3798 | 0.156 | 7.94E-02 |
| K | 21.301 | 1.3595 | 0.216 | 7.83E-02 |
| Chl-α | 14.689 | 0.91339 | 0.524 | 5.40E-02 |

**Bold** = significantly correlated with community structure at a = 0.05.

**Table S5.** Permutational MANOVA results of environmental variables, antibiotic concentrations and bacterial community compositions (9999 permutations).

| **Parameters** | **temporal** | | **spatial** | |
| --- | --- | --- | --- | --- |
| **Pseudo-F** | **P (perm)** | **Pseudo-F** | **P (perm)** |
| Environmental variables | 5.8512 | 0.0001 | 4.4141 | 0.0012 |
| Antibiotic concentrations | 2.3538 | 0.0031 | 3.4047 | 0.0001 |
| Bacterial community compositions | 2.3616 | 0.0001 | 2.28 | 0.0026 |

**Table S6.** Multiple linear correlations by rcor.test in ltm package (R language).

| **A** | **B** | **R** |
| --- | --- | --- |
| OTU3412 | OTU7991 | −0.84 |
| OTU16592 | OTU7991 | −0.81 |
| OTU16592 | OTU3412 | 0.97 |
| OTU20094 | OTU16592 | −0.8 |
| OTU7115 | OTU1659 | 0.85 |
| OTU7115 | OTU20094 | 0.87 |
| OTU5979 | OTU7991 | 0.82 |
| OTU5979 | OTU3412 | −0.8 |
| OTU5979 | OTU16592 | −0.8 |
| OTU5979 | OTU20094 | 0.85 |
| OTU5979 | OTU7115 | 0.8 |
| OTU606 | OTU3412 | 0.89 |
| OTU606 | OTU16592 | 0.84 |
| OTU3238 | OTU22095 | 0.79 |
| OTU3238 | OTU4718 | 0.8 |
| OTU21614 | OTU7991 | −0.87 |
| OTU21614 | OTU3412 | 0.9 |
| OTU21614 | OTU16592 | 0.93 |
| OTU21614 | OTU5979 | −0.82 |
| OTU18555 | OTU3412 | 0.79 |
| OTU17668 | OTU3412 | 0.83 |
| OTU17668 | OTU16592 | 0.79 |
| OTU17668 | OTU5979 | -0.79 |
| OTU17668 | OTU606 | 0.81 |
| OTU17668 | OTU3972 | 0.84 |
| OTU15974 | OTU20094 | 0.81 |
| OTU15974 | OTU7115 | 0.83 |
| OTU6344 | OTU15974 | 0.82 |
| OTU5985 | OTU6344 | 0.8 |
| OTU19343 | OTU1659 | 0.88 |
| OTU19343 | OTU20094 | 0.82 |
| OTU14914 | OTU1659 | 0.82 |
| OTU14914 | OTU20094 | 0.9 |
| OTU14914 | OTU7115 | 0.88 |
| OTU14914 | OTU5979 | 0.81 |
| OTU3929 | OTU3972 | 0.84 |
| OTU10486 | OTU15974 | 0.87 |
| OTU22474 | OTU19459 | 0.9 |
| OTU12896 | OTU4718 | 0.96 |
| OTU21726 | OTU3412 | 0.89 |
| OTU21726 | OTU16592 | 0.83 |
| OTU21726 | OTU606 | 0.98 |
| OTU21726 | OTU17668 | 0.89 |
| OTU2401 | OTU19459 | 0.95 |
| OTU2401 | OTU22474 | 0.88 |
| OTU860 | OTU3412 | 0.84 |
| OTU860 | OTU606 | 0.85 |
| OTU860 | OTU18555 | 0.93 |
| OTU860 | OTU21726 | 0.86 |
| OTU23719 | OTU3160 | 0.85 |
| OTU17847 | OTU7902 | 0.92 |
| OTU7033 | OTU3412 | 0.86 |
| OTU7033 | OTU16592 | 0.79 |
| OTU7033 | OTU606 | 0.93 |
| OTU7033 | OTU3972 | 0.83 |
| OTU7033 | OTU17668 | 0.92 |
| OTU7033 | OTU21726 | 0.98 |
| OTU7033 | OTU860 | 0.81 |
| OTU7484 | OTU3412 | 0.89 |
| OTU7484 | OTU16592 | 0.82 |
| OTU7484 | OTU606 | 0.98 |
| OTU7484 | OTU17668 | 0.89 |
| OTU7484 | OTU21726 | 1 |
| OTU7484 | OTU860 | 0.85 |
| OTU7484 | OTU7033 | 0.98 |
| OTU1834 | OTU1659 | 0.84 |
| OTU1834 | OTU7115 | 0.79 |
| OTU1834 | OTU14914 | 0.88 |
| OTU19751 | OTU14850 | 0.93 |
| OTU16090 | OTU14850 | 0.85 |
| OTU16090 | OTU19751 | 0.89 |
| OTU18312 | OTU22889 | 0.93 |
| OTU21307 | OTU3412 | 0.85 |
| OTU21307 | OTU16592 | 0.8 |
| OTU21307 | OTU606 | 0.97 |
| OTU21307 | OTU21726 | 0.94 |
| OTU21307 | OTU860 | 0.86 |
| OTU21307 | OTU7033 | 0.89 |
| OTU21307 | OTU7484 | 0.94 |
| OTU14926 | OTU6344 | 0.79 |
| OTU5225 | OTU1834 | 0.83 |
| OTU14100 | OTU19929 | 0.87 |
| OTU9372 | OTU14926 | 0.96 |
| OTU18054 | OTU8322 | 0.9 |
| OTU3735 | OTU19459 | 0.94 |
| OTU3735 | OTU22474 | 0.95 |
| OTU3735 | OTU2401 | 0.95 |
| OTU22391 | OTU3160 | 0.97 |
| OTU22391 | OTU23719 | 0.88 |
| OTU11682 | OTU3972 | 0.97 |
| OTU11682 | OTU17668 | 0.85 |
| OTU11682 | OTU3929 | 0.86 |
| OTU11682 | OTU12275 | 0.8 |
| OTU11682 | OTU7033 | 0.81 |
| OTU8668 | OTU3412 | 0.79 |
| OTU8668 | OTU606 | 0.85 |
| OTU8668 | OTU3972 | 0.93 |
| OTU8668 | OTU17668 | 0.94 |
| OTU8668 | OTU21726 | 0.93 |
| OTU8668 | OTU7033 | 0.97 |
| OTU8668 | OTU7484 | 0.93 |
| OTU8668 | OTU11682 | 0.91 |
| OTU9323 | OTU3972 | 0.97 |
| OTU9323 | OTU3929 | 0.86 |
| OTU9323 | OTU11682 | 0.97 |
| OTU9323 | OTU8668 | 0.84 |
| OTU14940 | OTU3160 | 0.98 |
| OTU14940 | OTU23719 | 0.88 |
| OTU14940 | OTU22391 | 0.99 |
| OTU14035 | OTU3160 | 0.96 |
| OTU14035 | OTU23719 | 0.88 |
| OTU14035 | OTU22391 | 0.98 |
| OTU14035 | OTU14940 | 0.99 |
| OTU7677 | OTU3160 | 0.99 |
| OTU7677 | OTU23719 | 0.86 |
| OTU7677 | OTU22391 | 0.99 |
| OTU7677 | OTU14940 | 0.99 |
| OTU7677 | OTU14035 | 0.98 |
| TC | OTU8322 | 0.79 |
| TC | OTU18054 | 0.8 |
| IC | TOC | −0.94 |
| Ammonia | OTU3412 | 0.88 |
| Ammonia | OTU16592 | 0.9 |
| Ammonia | OTU606 | 0.84 |
| Ammonia | OTU17668 | 0.79 |
| Ammonia | OTU21726 | 0.85 |
| Ammonia | OTU7033 | 0.83 |
| Ammonia | OTU7484 | 0.85 |
| Ammonia | OTU8668 | 0.81 |
| Turbidity | OTU22889 | 0.93 |
| Turbidity | OTU18312 | 0.8 |
| Temperature | OTU3412 | −0.81 |
| Temperature | OTU16592 | −0.81 |
| Temperature | OTU21614 | −0.81 |
| Temperature | OTU12275 | −0.8 |
| Cl | OTU3412 | 0.83 |
| Cl | OTU606 | 0.82 |
| Cl | OTU18555 | 0.83 |
| Cl | OTU3972 | 0.91 |
| Cl | OTU17668 | 0.88 |
| Cl | OTU21726 | 0.89 |
| Cl | OTU860 | 0.9 |
| Cl | OTU7033 | 0.9 |
| Cl | OTU7484 | 0.89 |
| Cl | OTU11682 | 0.85 |
| Cl | OTU8668 | 0.94 |
| Cl | OTU9323 | 0.81 |
| Cl | Ammonia | 0.83 |
| Sulfate | OTU22474 | 0.85 |
| Sulfate | OTU3735 | 0.82 |
| Ca | OTU18555 | 0.8 |
| Ca | Sulfate | 0.82 |
| Mg | OTU3412 | 0.82 |
| Mg | OTU18555 | 0.86 |
| Mg | OTU3972 | 0.86 |
| Mg | OTU17668 | 0.84 |
| Mg | OTU21726 | 0.81 |
| Mg | OTU860 | 0.88 |
| Mg | OTU7033 | 0.83 |
| Mg | OTU7484 | 0.81 |
| Mg | OTU11682 | 0.8 |
| Mg | OTU8668 | 0.87 |
| Mg | Temperature | −0.83 |
| Mg | Cl | 0.97 |
| Mg | Ca | 0.83 |
| Na | OTU3412 | 0.84 |
| Na | OTU606 | 0.81 |
| Na | OTU18555 | 0.83 |
| Na | OTU3972 | 0.91 |
| Na | OTU17668 | 0.88 |
| Na | OTU21726 | 0.88 |
| Na | OTU860 | 0.89 |
| Na | OTU7033 | 0.91 |
| Na | OTU7484 | 0.88 |
| Na | OTU11682 | 0.86 |
| Na | OTU8668 | 0.94 |
| Na | OTU9323 | 0.81 |
| Na | Ammonia | 0.83 |
| Na | Temperature | −0.8 |
| Na | Cl | 1 |
| Na | Mg | 0.97 |
| Al | OTU22889 | 0.89 |
| Al | OTU18312 | 0.93 |
| Al | Turbidity | 0.84 |
| K | OTU18555 | 0.82 |
| K | OTU3972 | 0.85 |
| K | OTU860 | 0.83 |
| K | OTU8668 | 0.81 |
| K | Cl | 0.94 |
| K | Ca | 0.8 |
| K | Mg | 0.92 |
| K | Na | 0.93 |
| Chlorophlly-a | OTU1659 | 0.82 |
| Chlorophlly-a | OTU17847 | 0.89 |
| LEX | OTU5225 | −0.81 |
| PEN-G | Turbidity | 0.81 |
| OTU20094 | OTU1659 | 0.78 |
| OTU19929 | OTU20094 | −0.78 |
| OTU9372 | OTU6344 | 0.79 |
| OTU8668 | OTU860 | 0.78 |
| OTU8668 | OTU21307 | 0.79 |
| Ammonia | OTU21614 | 0.79 |
| Ammonia | OTU860 | 0.78 |
| Ammonia | OTU21307 | 0.79 |
| Temperature | OTU19343 | 0.79 |
| Sulfate | OTU8322 | 0.79 |
| Mg | OTU9323 | 0.78 |
| K | OTU9323 | 0.78 |
| Tylosin | K | 0.78 |
| OTU18808 | OTU22095 | 0.76 |
| OTU17668 | OTU7991 | −0.77 |
| OTU15974 | OTU5979 | 0.77 |
| OTU19343 | OTU4207 | −0.77 |
| OTU860 | OTU16592 | 0.77 |
| OTU22779 | OTU21614 | 0.77 |
| OTU9323 | OTU17668 | 0.76 |
| OTU9323 | OTU12275 | 0.77 |
| Ammonia | OTU7991 | −0.78 |
| DO | OTU18555 | 0.77 |
| Cl | OTU21307 | 0.77 |
| Cl | Temperature | −0.77 |
| Ca | OTU20094 | −0.77 |
| Na | OTU16592 | 0.77 |
| Na | OTU21307 | 0.77 |
| K | OTU11682 | 0.76 |
| Chlorophlly-a | OTU7902 | 0.77 |
| PEN-G | OTU10747 | 0.76 |
| OTU18555 | OTU16592 | 0.75 |
| OTU6344 | OTU5979 | 0.75 |
| OTU5985 | OTU15974 | 0.76 |
| OTU19459 | OTU278 | 0.75 |
| OTU21726 | OTU3972 | 0.75 |
| OTU12275 | OTU3972 | 0.75 |
| OTU7484 | OTU3972 | 0.75 |
| TN | OTU22779 | 0.76 |
| Cl | OTU16592 | 0.75 |
| Mg | OTU5979 | −0.76 |
| Mg | OTU12275 | 0.76 |
| Mg | Ammonia | 0.75 |
| K | OTU17668 | 0.75 |
| K | Ammonia | 0.75 |
| PEN-G | OTU18808 | 0.75 |
| OTU20094 | OTU3412 | −0.75 |
| OTU19929 | OTU7115 | −0.75 |
| OTU14914 | OTU19343 | 0.75 |
| OTU10486 | OTU7115 | 0.75 |
| TN | OTU5979 | −0.75 |
| DO | pH | 0.75 |
| Temperature | OTU7991 | 0.74 |
| Temperature | OTU5979 | 0.75 |
| Temperature | OTU17668 | −0.75 |
| Ca | OTU5979 | −0.74 |
| Ca | OTU14914 | −0.75 |
| Mg | OTU16592 | 0.74 |
| Na | OTU7991 | −0.74 |
| K | OTU3412 | 0.74 |
| Tylosin | Cl | 0.74 |
| OTU4207 | OTU1659 | −0.74 |
| OTU7033 | OTU7991 | −0.73 |
| OTU22779 | OTU10747 | 0.74 |
| OTU8668 | OTU3929 | 0.74 |
| DO | OTU860 | 0.74 |
| Temperature | OTU20094 | 0.74 |
| Temperature | OTU7033 | −0.74 |
| Temperature | OTU11682 | −0.73 |
| Sulfate | OTU2401 | 0.73 |
| Mg | OTU606 | 0.74 |
| K | OTU7033 | 0.74 |
| Tylosin | Na | 0.73 |
| OTU21614 | OTU20094 | −0.73 |
| OTU6344 | OTU7991 | 0.73 |
| OTU22391 | OTU14100 | 0.73 |
| OTU8668 | OTU7991 | −0.73 |
| Ammonia | OTU5979 | −0.73 |
| Ammonia | OTU10844 | −0.73 |
| Temperature | OTU8668 | −0.73 |
| Na | OTU12275 | 0.73 |
| K | OTU21726 | 0.73 |
| K | OTU7484 | 0.73 |
| OTU20094 | OTU7991 | 0.72 |
| OTU15974 | OTU7991 | 0.72 |
| OTU15974 | OTU21614 | −0.72 |
| OTU6344 | OTU20094 | 0.72 |
| TN | OTU7991 | −0.72 |
| Temperature | OTU18555 | −0.72 |
| Temperature | Ammonia | −0.72 |
| Na | OTU5979 | −0.72 |
| K | DO | 0.72 |
| PEN-V | NFX | 0.72 |
| Tylosin | Ammonia | 0.72 |
| OTU5985 | OTU7991 | 0.72 |
| OTU3929 | OTU10301 | 0.72 |
| OTU8668 | OTU16592 | 0.72 |
| Cl | OTU7991 | −0.72 |
| Mg | OTU7991 | −0.72 |
| Na | DO | 0.72 |
| Na | Ca | 0.72 |
| Erythromycin | PEN-G | 0.72 |
| OTU19929 | OTU16592 | 0.71 |
| OTU19343 | OTU7115 | 0.71 |
| OTU21726 | OTU7991 | −0.71 |
| OTU23719 | OTU4207 | 0.71 |
| OTU7484 | OTU7991 | −0.71 |
| OTU1834 | OTU19343 | 0.71 |
| TN | OTU21614 | 0.71 |
| Sulfate | OTU19459 | 0.71 |
| Ca | Cl | 0.71 |
| PEN-G | OTU10301 | −0.71 |
| PEN-G | TP | 0.71 |
| OTU21614 | OTU606 | 0.71 |
| OTU7902 | OTU15974 | 0.71 |
| OTU21307 | OTU18555 | 0.71 |
| OTU21307 | OTU17668 | 0.71 |
| OTU11682 | OTU7484 | 0.71 |
| Ammonia | OTU18555 | 0.71 |
| Cl | OTU5979 | −0.71 |
| PEN-G | OTU14850 | 0.71 |
| OTU19929 | OTU15974 | −0.7 |
| OTU2401 | OTU10486 | 0.7 |
| OTU23719 | OTU19929 | 0.7 |
| OTU1834 | OTU20094 | 0.7 |
| OTU9372 | OTU5985 | 0.71 |
| OTU11682 | OTU21726 | 0.71 |
| Cl | OTU12275 | 0.7 |
| Cl | DO | 0.71 |
| OTU5979 | OTU1659 | 0.7 |
| OTU21726 | OTU21614 | 0.7 |
| OTU8322 | OTU18555 | 0.7 |
| OTU860 | OTU17668 | 0.7 |
| DO | OTU16592 | 0.7 |
| Temperature | OTU22779 | −0.7 |
| Mg | OTU21307 | 0.7 |
| Tylosin | Mg | 0.7 |
| OTU15974 | OTU16592 | −0.7 |
| OTU10486 | OTU19929 | −0.7 |
| OTU7902 | OTU5985 | 0.7 |
| OTU7484 | OTU21614 | 0.7 |
| OTU14035 | OTU14100 | 0.7 |
| OTU7677 | OTU14100 | 0.7 |
| PEN-G | OTU22889 | 0.7 |
| OTU17668 | OTU20094 | −0.69 |
| OTU17668 | OTU21614 | 0.69 |
| OTU12896 | OTU3238 | 0.69 |
| OTU7033 | OTU21614 | 0.69 |
| OTU9323 | OTU7033 | 0.69 |
| Temperature | DO | −0.69 |
| Mg | DO | 0.69 |
| Ca | OTU860 | 0.69 |
| OTU19929 | OTU3412 | 0.69 |
| OTU21726 | OTU18555 | 0.69 |
| TN | OTU6344 | −0.69 |
| DO | OTU3412 | 0.69 |
| OTU14914 | OTU15974 | 0.69 |
| Mg | OTU20094 | −0.69 |
| OTU7484 | OTU18555 | 0.68 |
| pH | OTU14100 | 0.68 |
| Temperature | OTU3972 | −0.68 |
| OTU18808 | OTU3238 | 0.68 |
| OTU19929 | OTU17668 | 0.68 |
| OTU10486 | OTU21614 | −0.68 |
| OTU860 | OTU3972 | 0.68 |
| OTU14100 | OTU3160 | 0.68 |
| OTU3735 | OTU8322 | 0.68 |
| Ammonia | OTU17415 | 0.68 |
| Ca | OTU8322 | 0.68 |
| Chlorophlly-a | OTU7115 | 0.68 |
| LIN | SQX | 0.68 |
| OTU18555 | OTU606 | 0.68 |
| OTU19343 | OTU5979 | 0.68 |
| OTU21307 | OTU21614 | 0.68 |
| Temperature | OTU1659 | 0.68 |
| Temperature | OTU21726 | −0.68 |
| Erythromycin | OTU14850 | 0.68 |
| POL | LIN | 0.68 |
| OTU14914 | OTU19929 | −0.68 |
| OTU2401 | OTU278 | 0.68 |
| OTU16090 | OTU10844 | 0.68 |
| OTU14940 | OTU14100 | 0.68 |
| Chlorophlly-a | OTU5979 | 0.67 |
| Chlorophlly-a | OTU19343 | 0.68 |
| Tylosin | OTU3972 | 0.68 |
| OTU12896 | OTU14850 | 0.67 |
| pH | OTU18808 | −0.67 |
| Temperature | OTU7484 | −0.67 |
| K | Temperature | −0.67 |
| OTU606 | OTU7991 | −0.67 |
| OTU18054 | OTU2401 | 0.67 |
| TN | OTU15974 | −0.67 |
| OTU20094 | OTU4207 | −0.67 |
| OTU21614 | OTU7115 | −0.67 |
| OTU22779 | OTU7991 | −0.67 |
| OTU8668 | OTU5979 | −0.67 |
| OTU8668 | OTU12275 | 0.67 |
| Turbidity | OTU10301 | −0.67 |
| Tylosin | OTU8668 | 0.67 |
| OTU7115 | OTU4207 | −0.67 |
| OTU14100 | OTU16592 | 0.67 |
| OTU22391 | OTU19929 | 0.67 |
| K | OTU16592 | 0.66 |
| K | pH | 0.66 |
| OTU19343 | OTU16592 | −0.66 |
| OTU10486 | OTU19459 | 0.66 |
| OTU7033 | OTU5979 | −0.66 |
| Ammonia | OTU11682 | 0.66 |
| Temperature | OTU860 | −0.66 |
| Sulfate | OTU18555 | 0.66 |
| OTU18555 | OTU5979 | −0.66 |
| OTU15974 | OTU17668 | −0.66 |
| OTU5985 | OTU5979 | 0.66 |
| OTU10486 | OTU16592 | −0.66 |
| TP | OTU10747 | 0.66 |
| Ca | OTU19343 | −0.66 |
| OTU19343 | OTU18555 | −0.66 |
| OTU8322 | OTU2401 | 0.66 |
| OTU11682 | OTU7991 | −0.66 |
| OTU278 | OTU22095 | 0.66 |
| OTU19929 | OTU1659 | −0.66 |
| OTU7902 | OTU7115 | 0.66 |
| PEN-G | pH | −0.66 |
| OTU22889 | OTU18808 | 0.66 |
| OTU21726 | OTU5979 | −0.66 |
| Ammonia | OTU3972 | 0.65 |
| Sulfate | OTU18054 | 0.65 |
| K | OTU7991 | −0.65 |
| K | OTU606 | 0.66 |
| OTU10486 | OTU20094 | 0.65 |
| OTU860 | OTU7991 | −0.65 |
| OTU7902 | OTU6344 | 0.65 |
| TN | OTU20094 | −0.65 |
| OTU3735 | OTU18054 | 0.65 |
| K | Sulfate | 0.65 |
| OTU17415 | OTU22095 | −0.65 |
| OTU5985 | OTU21614 | −0.65 |
| OTU14035 | OTU19929 | 0.65 |
| TP | OTU10301 | −0.65 |
| Erythromycin | OTU16090 | 0.65 |
| OTU18808 | OTU17415 | −0.65 |
| OTU7033 | OTU18555 | 0.65 |
| OTU14926 | OTU5985 | 0.65 |
| Ca | OTU22474 | 0.65 |
| OTU860 | OTU5979 | −0.65 |
| OTU22779 | OTU16592 | 0.65 |
| pH | OTU10844 | −0.65 |
| DO | OTU19343 | −0.65 |
| OTU18555 | OTU20094 | −0.65 |
| OTU12275 | OTU17668 | 0.65 |
| OTU7484 | OTU5979 | −0.65 |
| TN | OTU5985 | −0.65 |
| OTU8322 | OTU22474 | 0.64 |
| OTU7902 | OTU10486 | 0.64 |
| OTU22779 | OTU5979 | −0.64 |
| TN | OTU7902 | −0.64 |
| LIN | NFX | 0.64 |
| OTU14850 | OTU10747 | 0.64 |
| pH | OTU10301 | 0.64 |
| Mg | OTU19343 | −0.64 |
| IC | OTU17847 | -0.64 |
| OTU16090 | OTU18808 | 0.64 |
| OTU8668 | OTU18555 | 0.64 |
| Na | OTU21614 | 0.64 |
| Chlorophlly-a | Ca | −0.64 |
| OTU12896 | OTU10747 | 0.64 |
| OTU14035 | OTU4207 | 0.64 |
| OTU17668 | OTU7115 | −0.64 |
| OTU17847 | OTU1659 | 0.64 |
| OTU3735 | OTU278 | 0.64 |
| K | OTU5979 | −0.64 |
| Tylosin | OTU17668 | 0.64 |
| OTU19751 | OTU4718 | 0.64 |
| OTU10486 | OTU17668 | −0.64 |
| Tylosin | OTU7033 | 0.63 |
| Chlorophlly-a | TN | −0.63 |
| SQX | OTU6344 | 0.63 |
| OTU3929 | OTU278 | −0.63 |
